# Supplementary material
Source: bioRxiv or medRxiv preprint supplement (https://www.biorxiv.org/highwire/filestream/42891/field_highwire_adjunct_files/4/145060-5.pdf)
Supplement: Supplementary file [file 145060-5.pdf]

## Supporting material

Title: Actin impacts the late stages of prion formation and prion propagation

Authors: Douglas R. Lyke<sup>\*,†</sup>, Jane E. Dorweiler<sup>\*,†</sup>, Emily R. Legan<sup>†</sup>, Brett T. Wisniewski<sup>†</sup>, Emily E. Davis<sup>†</sup>, and Anita L. Manogaran<sup>†,§</sup>

\* These authors contributed equally to this work.

† Department of Biological Sciences, Marquette University, P.O. Box 1881, Milwaukee, WI 53201-1881

§ To whom correspondence should be addressed. Email: anita.manogaran@marquette.edu

**Supplemental Figure 1. Fixation and phalloidin-rhodamine staining alters the physical appearance of Sup35PrD-GFP aggregates.** Wildtype cells overexpressing Sup35PrD-GFP for approximately 24 hours were fixed and stained with rhodamine-phalloidin. Shown is an example of a ring structure that is jagged, likely an artifact of fixation/rhodamine-phalloidin treatment.

**Supplemental Figure 2. Generation of *act1-122* sibling isolates.** The original cytoduced high [*PIN*<sup>+</sup>] *act1-122* strain was streaked consecutively for single colony two times (approximately 30-50 generations) to generate sibling isolates M254 and M257. A second isolation, in which M231 was streaked for single colony consecutively six times (approximately 100-150 generations) was performed to generate sibling isolates M314 and M315.

**Supplemental Figure 3. Live cell imaging of wildtype cells expressing Rnq1-GFP.** Wildtype strains (M266) were mated to D163 containing a copper inducible Rnq1-GFP plasmid. Diploids were grown in SD-Leu overnight, and the Rnq1-GFP plasmid was induced for 4-6 hours. Cultures were time-lapse imaged for approximately 10 seconds. Movies are 15 frames per second, with each second representing 3.5 seconds of time.

**Supplemental Figure 4. Live cell imaging of *act1-122* cells expressing Rnq1-GFP.** *act1-122* (M257) were mated to D163 and heterozygous diploids (*ACT1/act1-122* [*PIN*<sup>+</sup>]) were induced and imaged similar to Supplemental Figure. Movies are 15 frames per second, with each second representing 3.5 seconds of time.

## References

- Bradley, M.E., and Liebman, S.W. (2003). Destabilizing interactions among [PSI(+)] and [PIN(+)] yeast prion variants. *Genetics* 165, 1675-1685.
- Derkatch, I.L., Bradley, M.E., Zhou, P., Chernoff, Y.O., and Liebman, S.W. (1997). Genetic and environmental factors affecting the de novo appearance of the [PSI+] prion in *Saccharomyces cerevisiae*. *Genetics* 147, 507-519.
- Du, Z., Valtierra, S., and Li, L. (2014). An insight into the complex prion-prion interaction network in the budding yeast *Saccharomyces cerevisiae*. *Prion* 8, 387-392.
- Lin, M.C., Galletta, B.J., Sept, D., and Cooper, J.A. (2010). Overlapping and distinct functions for cofilin, coronin and Aip1 in actin dynamics in vivo. *J Cell Sci* 123, 1329-1342.
- Manogaran, A.L., Fajardo, V.M., Reid, R.J., Rothstein, R., and Liebman, S.W. (2010). Most, but not all, yeast strains in the deletion library contain the [PIN(+)] prion. *Yeast* 27, 159-166.
- Manogaran, A.L., Hong, J.Y., Hufana, J., Tyedmers, J., Lindquist, S., and Liebman, S.W. (2011). Prion formation and polyglutamine aggregation are controlled by two classes of genes. *PLoS genetics* 7, e1001386.
- Manogaran, A.L., Kirkland, K.T., and Liebman, S.W. (2006). An engineered nonsense URA3 allele provides a versatile system to detect the presence, absence and appearance of the [PSI+] prion in *Saccharomyces cerevisiae*. *Yeast* 23, 141-147.
- Sondheimer, N., and Lindquist, S. (2000). Rnq1: an epigenetic modifier of protein function in yeast. *Mol Cell* 5, 163-172.
- Viggiano, S., Haarer, B., and Amberg, D.C. (2010). Correction/completion of the yeast actin, alanine scan alleles. *Genetics* 185, 391-394.
- Zhou, P., Derkatch, I.L., and Liebman, S.W. (2001). The relationship between visible intracellular aggregates that appear after overexpression of Sup35 and the yeast prion-like elements [PSI(+)] and [PIN(+)]. *Mol Microbiol* 39, 37-46.
